# Supplementary material for: Functional differences between AMPK α1 and α2 subunits in osteogenesis, osteoblast-associated induction of osteoclastogenesis, and adipogenesis
Source: PubMed Central journal article supplement (PMC5013406; doi:10.1038/srep32771), 2016-09-07
Supplement: srep32771-s1.pdf [file srep32771-s1.pdf]

**Functional differences between AMPK  $\alpha$ 1 and  $\alpha$ 2 subunits in osteogenesis,  
osteoblast-associated induction of osteoclastogenesis, and adipogenesis**

Yu-gang Wang<sup>1</sup>, Xiu-guo Han<sup>1</sup>, Ying Yang<sup>1</sup>, Han Qiao<sup>1</sup>, Ke-rong Dai<sup>1</sup>, Qi-ming Fan<sup>1,\*</sup>,  
Ting-ting Tang<sup>1,\*</sup>

<sup>1</sup>Shanghai Key Laboratory of Orthopedic Implants, Department of Orthopedic Surgery,  
Shanghai Ninth People's Hospital, Shanghai JiaoTong University School of Medicine, 639  
Zhizaoju Road, Shanghai 200011, People's Republic of China

**\* Corresponding author:**

**Ting-ting Tang**

Tel/fax: +8621 6313 7020

E-mail: [tingtingtang@hotmail.com](mailto:tingtingtang@hotmail.com)

**Qi-ming Fan**

Tel/fax: +8621 6313 9920

E-mail: [chillow@163.com](mailto:chillow@163.com)

**Supplementary table 1: primer sequences**

| Gene                | Primer sequences (5'-3')                                 | Product length (bp) |
|---------------------|----------------------------------------------------------|---------------------|
| hAMPK $\alpha$ 1    | TTGAAACCTGAAAATGTCCTGCT (F)<br>GGTGAGCCACAACCTTGTCTT (R) | 113                 |
| hAMPK $\alpha$ 2    | GTGAAGATCGGACACTACGTG (F)<br>CTGCCACTTTATGGCCTGTTA (R)   | 100                 |
| hALP                | AACATCAGGGACATTGACGTG (F)<br>GTATCTCGGTTTGAAGCTCTTCC (R) | 159                 |
| hBSP                | CACTGGAGCCAATGCAGAAGA (F)<br>TGGTGGGGTTGTAGGTTCAA (R)    | 106                 |
| hOC                 | GAGCCCCAGTCCCCTACCCG (F)<br>GACACCCTAGACCGGGCCGT (R)     | 137                 |
| h $\beta$ -actin    | CATGTACGTTGCTATCCAGGC (F)<br>CTCCTTAATGTCACGCACGAT (R)   | 250                 |
| mRunx2              | TTCAACGATCTGAGATTTGTGGG (F)<br>GGATGAGGAATGCGCCCTA (R)   | 221                 |
| mALP                | CCAACTCTTTGTGCCAGAGA (F)<br>GGCTACATTGGTGTGAGCTTTT (R)   | 110                 |
| mBSP                | ATGGAGACGGCGATAGTTCC (F)<br>CTAGCTGTTACACCCGAGAGT (R)    | 148                 |
| mOC                 | CTGACCTCACAGATCCCAAGC (F)<br>TGGTCTGATAGCTCGTCACAAG (R)  | 187                 |
| mAMPK $\alpha$ 1    | TACTCAACCGGCAGAAGATTCG (F)<br>AGACGGCGGCTTTCCTTTT (R)    | 220                 |
| mAMPK $\alpha$ 2    | CAGGCCATAAAGTGGCAGTTA (F)<br>AAAAGTCTGTCTGGAGTGCTGA (R)  | 156                 |
| mNFAT2              | TTCGAGTTCGATCAGAGCGG (F)<br>TCTCTGTAGGCTTCCAGGCT (R)     | 419                 |
| mTRACP              | GAGAAAGTCAAGGGAGTGGCA (F)<br>ATGATGAAGTCAGCGCCCAT (R)    | 330                 |
| mCATK               | GCCACGCTTCTATCCGAAA (F)<br>AGAGCTGAAAGCCCAACAGG (R)      | 483                 |
| mCALCR              | GCAGGCACTGCTAAGGAGA (F)<br>TCCGCCTTTTCACTCTGGAC (R)      | 321                 |
| mIntegrin $\beta$ 3 | CTCCCTTCTCCCTCCCCTC (F)<br>GCCTCACTGACTGGGAACTC (R)      | 346                 |
| mAR                 | TGAGTACCGCATGCACAAGT (F)<br>TCAGGAAAGTCCACGCTCAC (R)     | 366                 |
| mOsteoactivin       | GTCCTGATCTCCATCGGCTG (F)<br>AACAAAGTTCCCAGCCACA (R)      | 302                 |
| mM-CSF              | AAAAGCCACTCTTGGGGCAT (F)<br>TGGTGAGGGGTCATAGAATCC (R)    | 414                 |
| mRANKL              | CCGAGACTACGGCAAGTACC (F)<br>CCACATCCAACCATGAGCCT (R)     | 446                 |

| Gene             | Primer sequences (5'-3')                               | Product length (bp) |
|------------------|--------------------------------------------------------|---------------------|
| mMMP24           | CACCGGTGTGTTGGATCAGA (F)<br>ATGGGCTAGGAATCCCCCTT (R)   | 367                 |
| mPhospho1        | ATGAGCGGGTGTTCAG (F)<br>ATCGAAGTCGAAGGTGAGGAG (R)      | 102                 |
| mOPG             | CCTTGCCCTGACCACTCTTAT (F)<br>CACACACTCGGTTGTGGGT (R)   | 127                 |
| m $\beta$ -actin | GGCTGTATTCCCCTCCATCG (F)<br>CCAGTTGGTAACAATGCCATGT (R) | 154                 |

h: human, m: mouse, F: forward, R: reverse

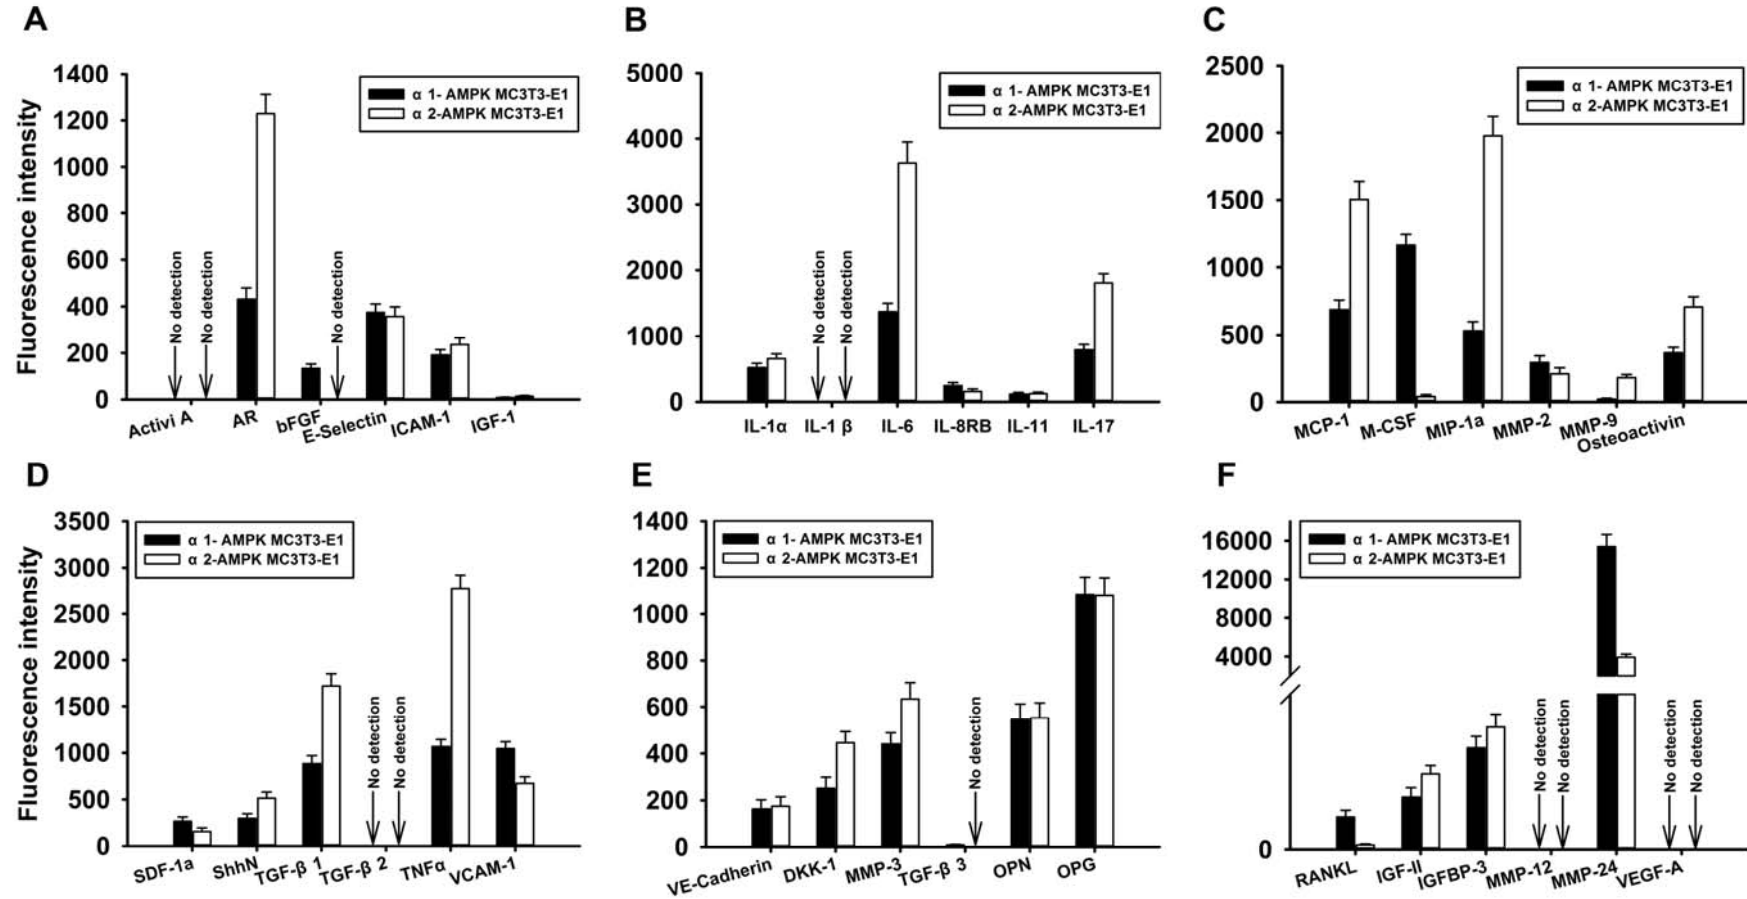

Supplementary figure 1

**Supplementary figure 1:** MC3T3-E1 cells infected with LV-hAMPK $\alpha$ 1 or LV-hAMPK $\alpha$ 2 were treated with BMP2 for 7 days. The protein expression of 36 markers of bone metabolisms was evaluated using an antibody array, with the relative expression level represented by fluorescent signal intensity.

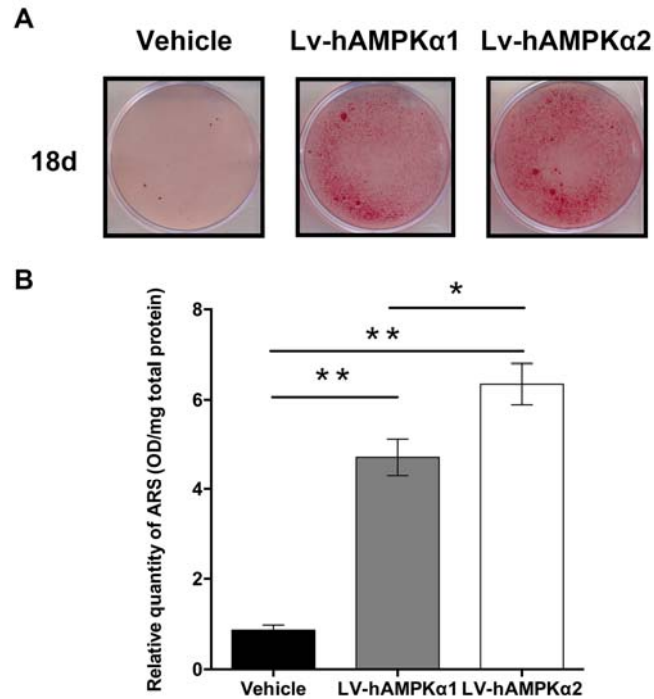

**Supplementary figure 2**

**Supplementary figure 2. Osteogenesis in MC3T3-E1 cells expressing AMPK  $\alpha$ 1 and  $\alpha$ 2.** Osteogenesis was induced with an osteogenic medium (100nM dexamethasone, 50 $\mu$ g/mL ascorbic acid and 10mM sodium  $\beta$ -glycerol-phosphate) for 18 days. **(A)** Calcium deposition was assessed by Alizarin Red staining. **(B)** Calcium deposition activity was assayed using colorimetrically quantitative analysis at 590 nm. Data are shown as mean  $\pm$  SD.

\*P < 0.05, \*\*P < 0.01.
